# Supplementary material
Source: PubMed Central journal article supplement (PMC3796954)
Supplement: NIHMS515219-supplement-Supporting_Information.pdf [file NIHMS515219-supplement-Supporting_Information.pdf]

## Supporting Information

### Dye-sensitized Solar Cell with Energy Storage Function through PVDF/ZnO Nanocomposite Counter Electrode

By *Xi Zhang, Xuezhen Huang, Chensha Li, and Hongrui Jiang\**

[\*] Prof. H. Jiang, Dr. X. Zhang, Dr. X. Huang, Dr. C. Li  
Materials Science Program, Department of Electrical and Computer Engineering  
University of Wisconsin-Madison  
Madison, WI 53706 (USA)  
E-mail: hongrui@engr.wisc.edu

*Keywords:* Dye-sensitized solar cells, PVDF, ZnO nanowire array, energy storage

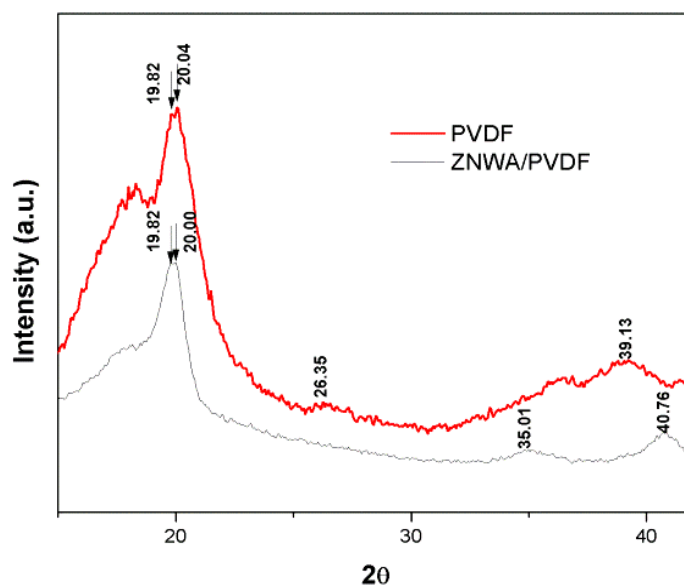

Figure S1 XRD spectra of a PVDF film and a PVDF/ZNWA nanocomposite prepared by casting PVDF/DMSO (1 g PVDF/100 g DMSO) solution onto an FTO substrate and a ZNWA/FTO substrate, respectively, followed by an annealing at 90 °C for 30 min in air.
